# Supplementary material for: Synthesis and photophysical properties of charge transfer cocrystals based on TCNB and fluorene and its derivatives
Source: Royal Society of Chemistry journal article supplement (doi:10.1039/d3ce01208e), 2024-01-01
Supplement: d3ce01208e1.pdf [file d3ce01208e1.pdf]

Electronic Supplementary Information for

# **Synthesis and photophysical properties of charge transfer cocrystals based on TCNB and fluorene and its derivatives**

**Wenxiu Yao,<sup>a</sup> Pengfei Wu,<sup>a</sup> Yidan Xie,<sup>a</sup> Xinyu Shen,<sup>a</sup> Shuwei Xia<sup>\*a</sup> and Liangmin Yu<sup>\*a</sup>**

<sup>a</sup> Key Laboratory of Marine Chemistry Theory and Technology, Ministry of Education, College of Chemistry and Chemical Engineering, Ocean University of China, Qingdao 266100, China

\* Corresponding author

E-mail: shuweixia@ouc.edu.cn; yuyan@ouc.edu.cn

Table S1. Bond length in TCNB, TCNB anion and cocrystals. (a, b, c, d, and e represent the corresponding bond length shown in the right figure.)

|                    | a (Å)  | b (Å)  | c (Å)  | d (Å)  | e (Å)  |
|--------------------|--------|--------|--------|--------|--------|
| <b>TCNB</b>        | 1.4009 | 1.3924 | 1.0214 | 1.4432 | 1.1382 |
| <b>TCNB anion</b>  | 1.4356 | 1.3872 | 0.9152 | 1.4310 | 1.1521 |
| <b>TCNB-FR</b>     | 1.4114 | 1.3880 | 0.9501 | 1.4392 | 1.1455 |
| <b>TCNB-2-BrFR</b> | 1.3885 | 1.3967 | 0.9497 | 1.4429 | 1.1495 |
| <b>TCNB-CZ</b>     | 1.4035 | 1.3892 | 0.9500 | 1.4418 | 1.1461 |
| <b>TCNB-2-BrCZ</b> | 1.4024 | 1.3883 | 0.9502 | 1.4388 | 1.1436 |

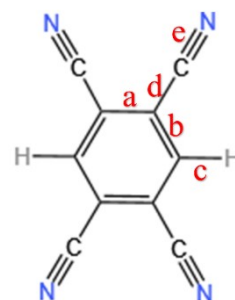

Table S2. Binding energy of cocrystals.

|                            | TCNB-FR   | TCNB-2-BrFR | TCNB-CZ   | TCNB-2-BrCZ |
|----------------------------|-----------|-------------|-----------|-------------|
| <b>E<sub>D</sub> (eV)</b>  | -2174.990 | -2524.327   | -2275.140 | -2624.474   |
| <b>E<sub>A</sub> (eV)</b>  | -2660.325 | -2660.327   | -2660.325 | -2660.325   |
| <b>E<sub>DA</sub> (eV)</b> | -4835.444 | -5184.749   | -4935.615 | -5284.916   |
| <b>ΔE (kJ/mol)</b>         | -12.414   | -9.152      | -14.440   | -11.249     |
| <b>E (kJ/mol)</b>          | 12.414    | 9.152       | 14.440    | 11.249      |

Table S3. ADCH charge difference of TCNB-FR, TCNB-2-BrFR.

| TCNB-FR |         |     |         | TCNB-2-BrFR |         |        |         |
|---------|---------|-----|---------|-------------|---------|--------|---------|
| TCNB    |         | FR  |         | TCNB        |         | 2-BrFR |         |
| N1      | -0.0909 | C9  | 0.0579  | N24         | -0.2064 | Br1    | -0.0598 |
| N2      | -0.0236 | H10 | -0.6606 | N25         | -0.0486 | C2     | -0.0849 |
| C3      | -0.1410 | C11 | 1.5985  | C26         | 0.1477  | H3     | -0.1327 |
| C4      | -0.0536 | H12 | -0.5394 | C27         | -0.0832 | C4     | 0.0286  |
| C5      | 0.0572  | C13 | -0.2094 | C28         | -0.0208 | H5     | 0.0346  |
| C6      | 0.0914  | H14 | 0.2498  | C29         | 0.4324  | H6     | -0.0377 |
| C7      | -0.0273 | C15 | -0.5394 | H30         | -0.2474 | C7     | 1.2732  |
| H8      | -0.0098 | C16 | -0.1711 | C31         | 0.1796  | H8     | -0.5855 |
| N32     | -0.0262 | C17 | 0.4764  | N32         | 0.3888  | C9     | -0.1715 |
| N33     | -0.0848 | H18 | -0.2759 | N33         | -0.0987 | C10    | -0.3491 |
| C34     | -0.0815 | C19 | 0.0873  | C34         | 0.3083  | C11    | 0.3117  |
| C35     | 0.2352  | H20 | -0.0375 | C35         | -0.1400 | H12    | -0.1361 |
| C36     | -0.0331 | H21 | 0.0347  | C36         | 0.0909  | C13    | -0.0984 |
| C37     | -0.0374 | C22 | 0.1299  | C37         | -0.0340 | C14    | -0.1121 |
| C38     | 0.4211  | C23 | 0.5159  | H38         | -0.0139 | H15    | 0.1842  |
| H39     | -0.2417 | H24 | -0.4264 | C39         | -0.6901 | C16    | 0.3569  |

|       |         |       |         |       |         |       |         |
|-------|---------|-------|---------|-------|---------|-------|---------|
|       |         | C25   | -0.1603 |       |         | H17   | -0.2721 |
|       |         | H26   | 0.0076  |       |         | C18   | -0.1086 |
|       |         | C27   | -0.2438 |       |         | C19   | -0.4807 |
|       |         | C28   | 0.2664  |       |         | C20   | 1.4980  |
|       |         | H29   | -0.2468 |       |         | H21   | -0.5286 |
|       |         | C30   | 0.4354  |       |         | C22   | 0.1860  |
|       |         | H31   | -0.3033 |       |         | H23   | -0.6799 |
| Total | -0.0459 | Total | +0.0459 | Total | -0.0354 | Total | +0.0354 |

Table S4. ADCH charge difference of TCNB-CZ, TCNB-2-BrCZ.

| TCNB-CZ |         |       |         | TCNB-2-BrCZ |         |        |         |
|---------|---------|-------|---------|-------------|---------|--------|---------|
| TCNB    |         | CZ    |         | TCNB        |         | 2-BrCZ |         |
| N1      | 0.2411  | C9    | 0.4408  | N2          | 0.3590  | Br1    | -0.0509 |
| N2      | -0.0557 | H10   | -0.2855 | N5          | -0.1755 | N3     | -0.4586 |
| C3      | -0.0989 | C11   | 0.3323  | N6          | 0.2897  | H4     | 0.1187  |
| C4      | 0.2086  | H12   | -0.2413 | C7          | 0.1880  | C18    | 0.0096  |
| C5      | 0.3701  | C13   | 0.2324  | C8          | 0.2282  | C19    | -0.1062 |
| H6      | -0.1818 | H14   | -0.3933 | C9          | -0.6591 | C20    | 0.0934  |
| C7      | -0.5071 | C15   | 0.3645  | N10         | -0.0726 | C21    | 0.1504  |
| C8      | 0.0146  | C16   | 0.0822  | C11         | -0.1078 | H22    | -0.1173 |
| N31     | -0.0070 | C17   | -0.2985 | C12         | 0.3803  | C24    | 0.0969  |
| N32     | -0.1592 | H18   | 0.0064  | H13         | -0.1843 | C26    | 0.3419  |
| C33     | -0.1558 | C19   | 0.0793  | C14         | 0.4704  | H27    | -0.2706 |
| C34     | -0.1599 | C20   | -0.0500 | H15         | -0.2184 | C28    | -1.8419 |
| C35     | 0.4507  | N21   | -0.6227 | C16         | 0.1568  | H29    | 0.4531  |
| H36     | -0.2019 | H22   | 0.1422  | C17         | -0.1580 | C30    | 0.2016  |
| C37     | 0.0135  | C23   | 1.0218  | C23         | -0.5845 | H31    | -0.1483 |
| C38     | 0.1480  | H24   | -0.4930 | C25         | 0.0212  | C32    | -0.0426 |
|         |         | C25   | -0.8235 |             |         | C33    | 0.9620  |
|         |         | H26   | 0.0339  |             |         | H34    | -0.2415 |
|         |         | C27   | 0.7755  |             |         | C35    | 1.2203  |
|         |         | H28   | -0.4546 |             |         | H36    | -0.5328 |
|         |         | C29   | 0.5730  |             |         | C37    | 0.5691  |
|         |         | H30   | -0.3413 |             |         | H38    | -0.3396 |
| Total   | -0.0807 | Total | +0.0807 | Total       | -0.0667 | Total  | +0.0667 |

Table S5. Topological parameters of the cocrystals.

| Hydrogen bonding     | r (Å)  | $\rho$ (a.u.) | $\nabla^2\rho$ (a.u.) | G (a.u.) | V (a.u.) | H (a.u.) | $E_{HB}$ (kcal/mol) | -G/V   |
|----------------------|--------|---------------|-----------------------|----------|----------|----------|---------------------|--------|
| <b>TCNB-FR</b>       |        |               |                       |          |          |          |                     |        |
| <b>C21-H22...N63</b> | 2.8255 | 0.0051        | 0.0174                | 0.0035   | -0.0027  | 0.0008   | -0.3912             | 1.3039 |

|                 |        |        |        |        |         |        |         |        |
|-----------------|--------|--------|--------|--------|---------|--------|---------|--------|
| N63...H16-C15   | 2.4658 | 0.0097 | 0.0318 | 0.0069 | -0.0059 | 0.0010 | -1.4208 | 1.1729 |
| C87-H88...N72   | 2.6916 | 0.0065 | 0.0219 | 0.0045 | -0.0035 | 0.0010 | -0.6975 | 1.2774 |
| N72...H18-C17   | 2.6096 | 0.0074 | 0.0239 | 0.0050 | -0.0041 | 0.0009 | -0.8974 | 1.2297 |
| C102-H103...N64 | 2.6109 | 0.0073 | 0.0239 | 0.0050 | -0.0041 | 0.0009 | -0.8936 | 1.2301 |
| N64...H49-C48   | 2.6924 | 0.0064 | 0.0219 | 0.0045 | -0.0035 | 0.0010 | -0.6955 | 1.2777 |
| C131-H132...N71 | 2.4648 | 0.0097 | 0.0318 | 0.0069 | -0.0059 | 0.0010 | -1.4252 | 1.1725 |
| N71...H107-C106 | 2.8248 | 0.0051 | 0.0174 | 0.0035 | -0.0027 | 0.0008 | -0.3927 | 1.3037 |
| C69-H70...N9    | 2.4660 | 0.0097 | 0.0318 | 0.0069 | -0.0059 | 0.0010 | -1.4224 | 1.1715 |
| N125...H78-C77  | 2.4653 | 0.0097 | 0.0318 | 0.0069 | -0.0059 | 0.0010 | -1.4255 | 1.1713 |

---

**TCNB-2-BrFR**

---

|                  |        |        |        |        |         |        |         |        |
|------------------|--------|--------|--------|--------|---------|--------|---------|--------|
| C84-H85...N87    | 2.6798 | 0.0066 | 0.0217 | 0.0045 | -0.0036 | 0.0009 | -0.7310 | 1.2601 |
| N87...H17-C16    | 2.5438 | 0.0088 | 0.0303 | 0.0064 | -0.0052 | 0.0012 | -1.2307 | 1.2346 |
| N87...H15-C14    | 2.9179 | 0.0049 | 0.0162 | 0.0033 | -0.0025 | 0.0008 | -0.3477 | 1.3266 |
| C130-H131...N118 | 2.3454 | 0.0122 | 0.0393 | 0.0089 | -0.0079 | 0.0010 | -1.9903 | 1.1224 |
| C76-H77...N118   | 2.9096 | 0.0046 | 0.0164 | 0.0033 | -0.0024 | 0.0008 | -0.2846 | 1.3386 |
| N118...H85-C84   | 2.6462 | 0.0072 | 0.0239 | 0.0050 | -0.0040 | 0.0010 | -0.8603 | 1.2527 |
| C53-H54...N88    | 2.6469 | 0.0072 | 0.0238 | 0.0050 | -0.0040 | 0.0010 | -0.8580 | 1.2528 |
| N88...H46-C45    | 2.9088 | 0.0046 | 0.0164 | 0.0033 | -0.0024 | 0.0008 | -0.2861 | 1.3384 |
| N88...H61-C60    | 2.3450 | 0.0123 | 0.0393 | 0.0089 | -0.0079 | 0.0010 | -1.9917 | 1.1223 |
| C107-H108...N117 | 2.9178 | 0.0049 | 0.0163 | 0.0033 | -0.0025 | 0.0008 | -0.3484 | 1.3265 |
| C109-H110...N117 | 2.5429 | 0.0089 | 0.0303 | 0.0064 | -0.0052 | 0.0012 | -1.2344 | 1.2343 |
| N117...H54-C53   | 2.6796 | 0.0066 | 0.0217 | 0.0045 | -0.0036 | 0.0009 | -0.7318 | 1.2599 |
| C92-H93...N56    | 2.3451 | 0.0123 | 0.0392 | 0.0089 | -0.0079 | 0.0010 | -1.9960 | 1.1201 |
| N126...H123-C122 | 2.3450 | 0.0123 | 0.0392 | 0.0089 | -0.0079 | 0.0010 | -1.9960 | 1.1201 |

---

**TCNB-CZ**

---

|                 |        |        |        |        |         |        |         |        |
|-----------------|--------|--------|--------|--------|---------|--------|---------|--------|
| C41-H42...N62   | 2.9816 | 0.0038 | 0.0131 | 0.0026 | -0.0019 | 0.0007 | -0.1081 | 0.0072 |
| N62...H40-C39   | 2.7211 | 0.0063 | 0.0212 | 0.0044 | -0.0035 | 0.0009 | -0.6678 | 0.0118 |
| N62...H90-C89   | 2.5034 | 0.0090 | 0.0304 | 0.0065 | -0.0054 | 0.0011 | -1.2726 | 0.0169 |
| C15-H16...N69   | 2.6530 | 0.0070 | 0.0241 | 0.0050 | -0.0039 | 0.0011 | -0.8201 | 0.0136 |
| N69...H42-C41   | 2.5097 | 0.0090 | 0.0293 | 0.0063 | -0.0052 | 0.0011 | -1.2556 | 0.0182 |
| C111-H112...N61 | 2.5096 | 0.0090 | 0.0294 | 0.0063 | -0.0052 | 0.0011 | -1.2558 | 0.0182 |
| N61...H130-C129 | 2.6522 | 0.0070 | 0.0242 | 0.0050 | -0.0039 | 0.0011 | -0.8228 | 0.0136 |
| C49-H50...N70   | 2.5035 | 0.0090 | 0.0304 | 0.0065 | -0.0054 | 0.0011 | -1.2723 | 0.0169 |
| C109-H110...N70 | 2.7200 | 0.0063 | 0.0213 | 0.0044 | -0.0035 | 0.0009 | -0.6711 | 0.0118 |
| N70...H112-C111 | 2.9807 | 0.0038 | 0.0131 | 0.0026 | -0.0019 | 0.0007 | -0.1092 | 0.0072 |
| C65-H66...N86   | 2.5028 | 0.0091 | 0.0304 | 0.0065 | -0.0054 | 0.0011 | -1.2782 | 0.0169 |
| N46...H74-C73   | 2.5035 | 0.0090 | 0.0304 | 0.0065 | -0.0054 | 0.0011 | -1.2756 | 0.0169 |

---

**TCNB-2-BrCZ**

---

|                |        |        |        |        |         |        |         |        |
|----------------|--------|--------|--------|--------|---------|--------|---------|--------|
| N101...H34-C33 | 2.5288 | 0.0089 | 0.0302 | 0.0064 | -0.0052 | 0.0012 | -1.2425 | 0.0175 |
| N101...H29-C28 | 3.0296 | 0.0041 | 0.0135 | 0.0027 | -0.0020 | 0.0007 | -0.1675 | 0.0078 |

|                        |        |        |        |        |         |        |         |        |
|------------------------|--------|--------|--------|--------|---------|--------|---------|--------|
| <b>C97-H98...N100</b>  | 2.9424 | 0.0042 | 0.0139 | 0.0028 | -0.0021 | 0.0007 | -0.1987 | 0.0081 |
| <b>N78-H79...N100</b>  | 2.0820 | 0.0195 | 0.0639 | 0.0151 | -0.0142 | 0.0009 | -3.5969 | 0.0357 |
| <b>C73-H74...N105</b>  | 2.6295 | 0.0074 | 0.0245 | 0.0051 | -0.0041 | 0.0010 | -0.9082 | 0.0149 |
| <b>N105...H67-C66</b>  | 2.9160 | 0.0046 | 0.0162 | 0.0032 | -0.0024 | 0.0008 | -0.2779 | 0.0083 |
| <b>N105...H10-C9</b>   | 2.4422 | 0.0101 | 0.0326 | 0.0072 | -0.0063 | 0.0010 | -1.5161 | 0.0186 |
| <b>C49-H50...N99</b>   | 2.4236 | 0.0104 | 0.0330 | 0.0074 | -0.0065 | 0.0009 | -1.5756 | 0.0191 |
| <b>N99...H74-C73</b>   | 2.7612 | 0.0057 | 0.0187 | 0.0039 | -0.0030 | 0.0008 | -0.5386 | 0.0113 |
| <b>C107-H108...N7</b>  | 2.4410 | 0.0102 | 0.0326 | 0.0072 | -0.0063 | 0.0009 | -1.5269 | 0.0186 |
| <b>N39...H110-C109</b> | 2.4243 | 0.0104 | 0.0329 | 0.0073 | -0.0065 | 0.0009 | -1.5729 | 0.0191 |

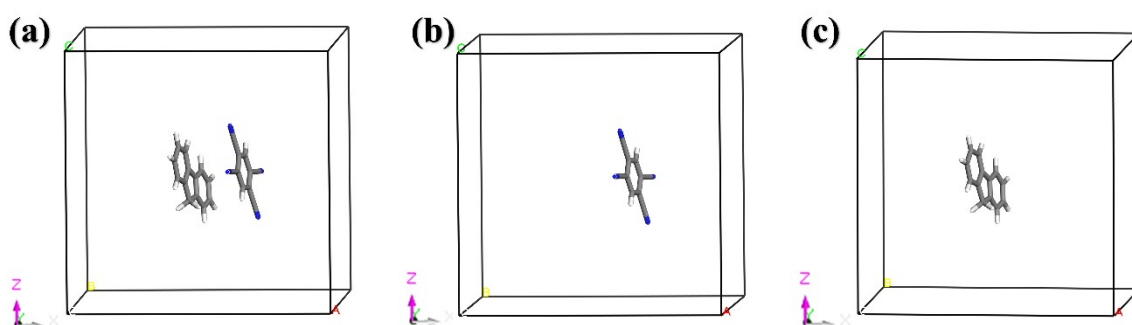

Figure S1. Binding energy calculation model of (a) TCNB-FR, (b) TCNB, (c) FR.

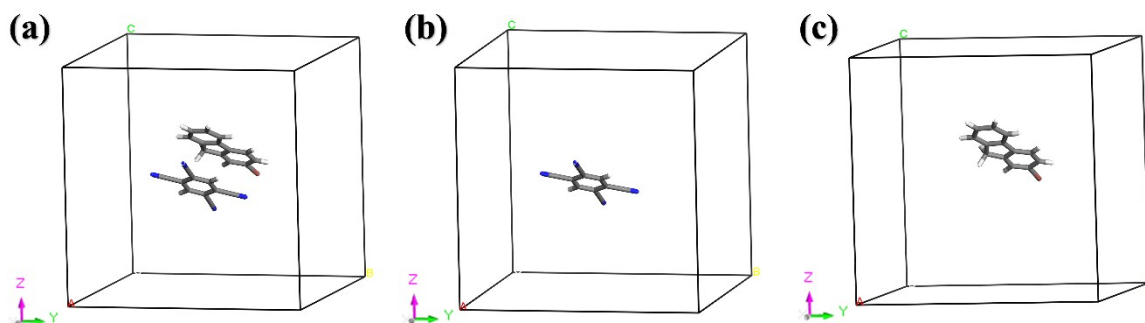

Figure S2. Binding energy calculation model of (a) TCNB-2-BrFR, (b) TCNB, (c) 2-BrFR.

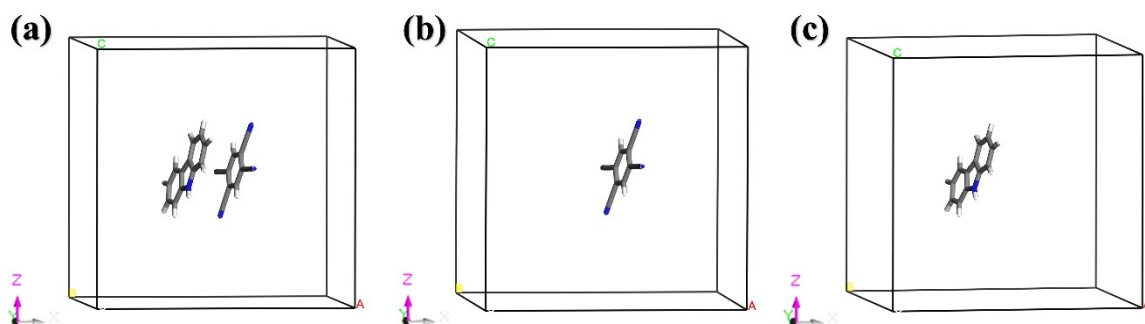

Figure S3. Binding energy calculation model of (a) TCNB-CZ, (b) TCNB, (c) CZ.

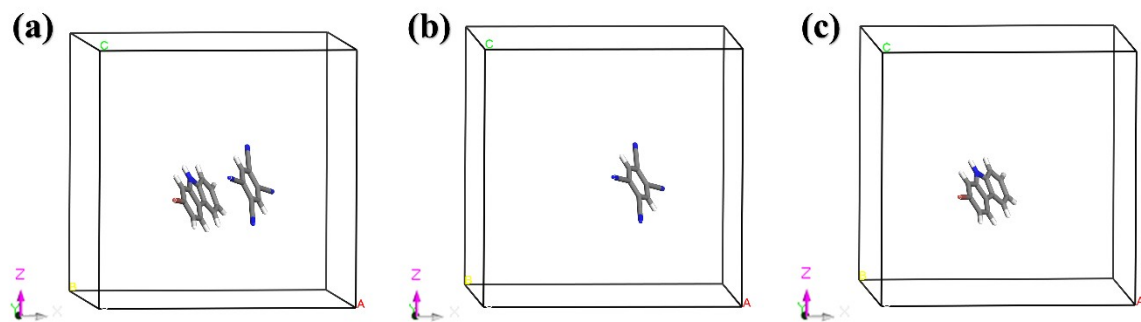

Figure S4. Binding energy calculation model of (a) TCNB-2-BrCZ, (b) TCNB, (c) 2-BrCZ.

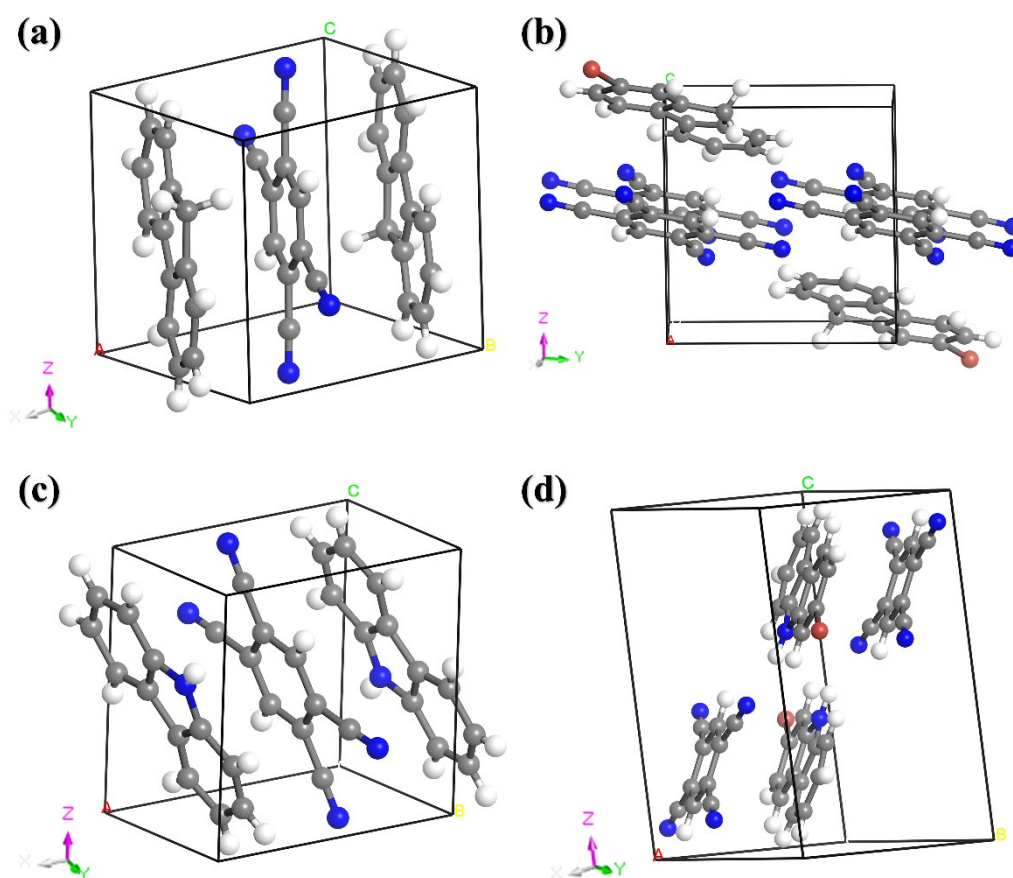

Figure S5. Unit cell of cocrystals (a) TCNB-FR, (b) TCNB-2-BrFR, (c) TCNB-CZ, (d) TCNB-2-BrCZ.

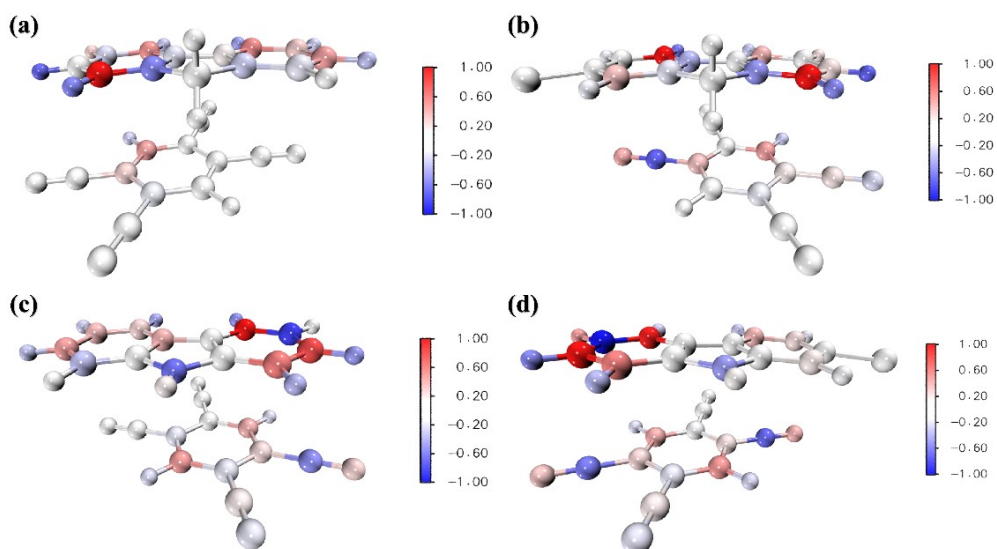

Figure S6. Dimer charge difference distribution of the cocrystals.

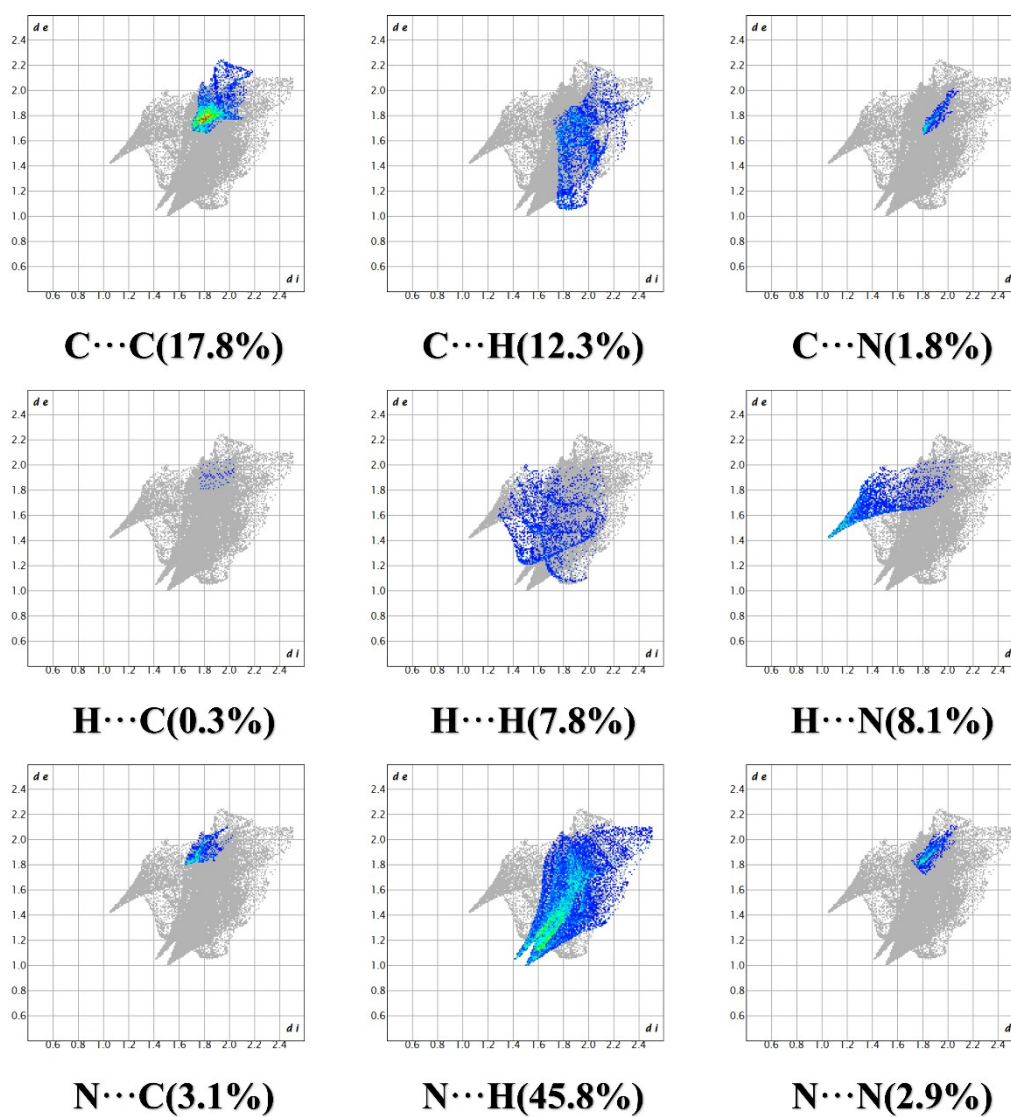

Figure S7. 2D fingerprint distribution and interaction proportion of TCNB-FR.

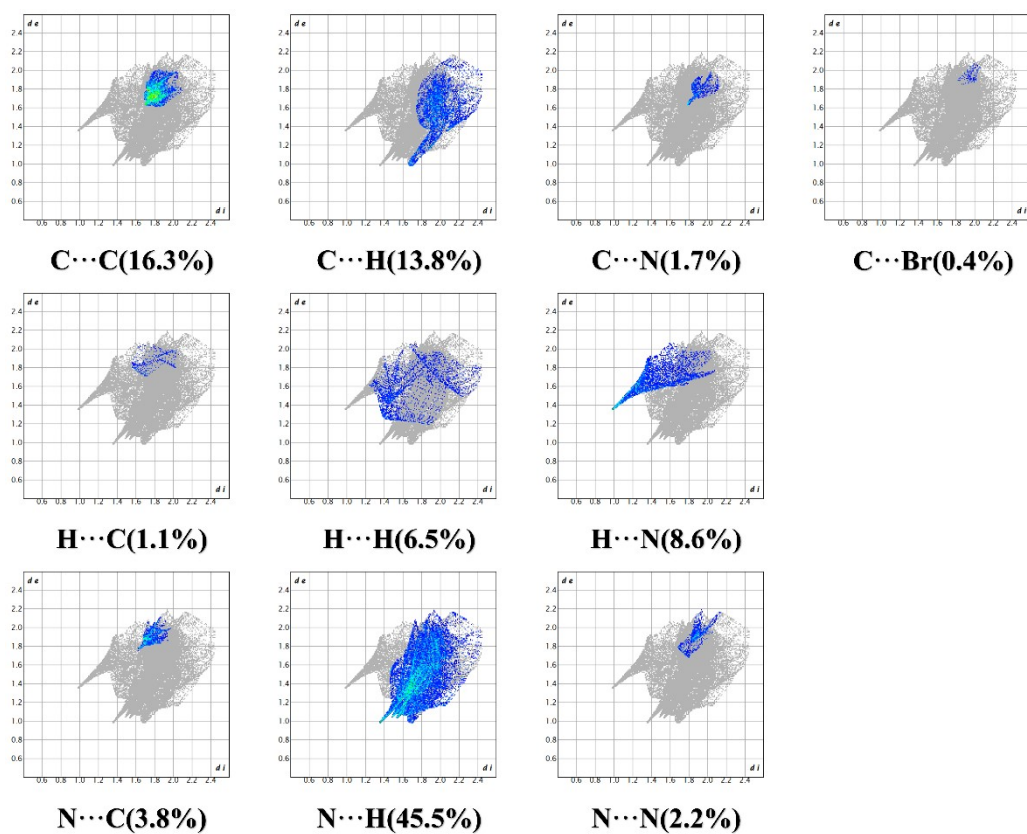

Figure S8. 2D fingerprint distribution and interaction proportion of TCNB-2-BrFR.



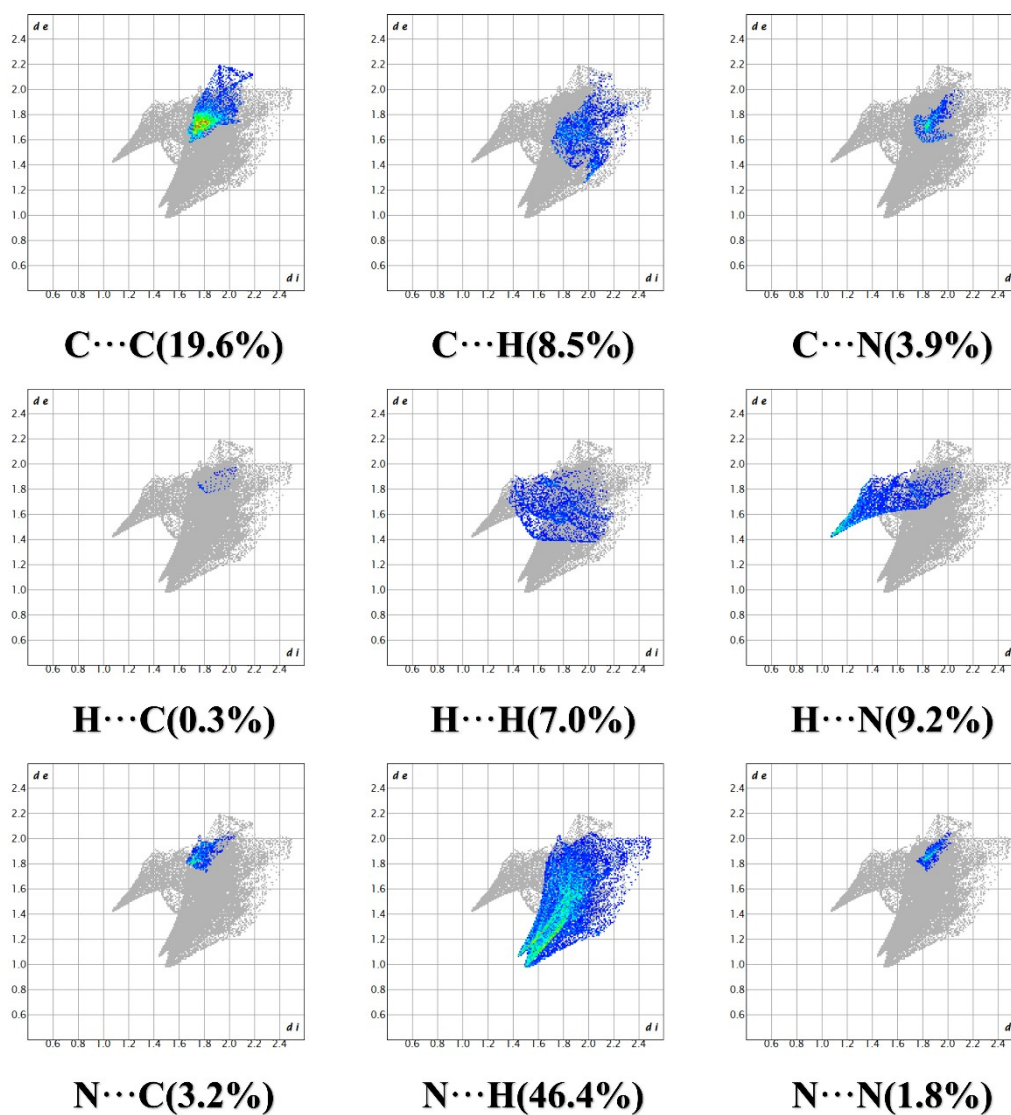

Figure S9. 2D fingerprint distribution and interaction proportion of TCNB-CZ.

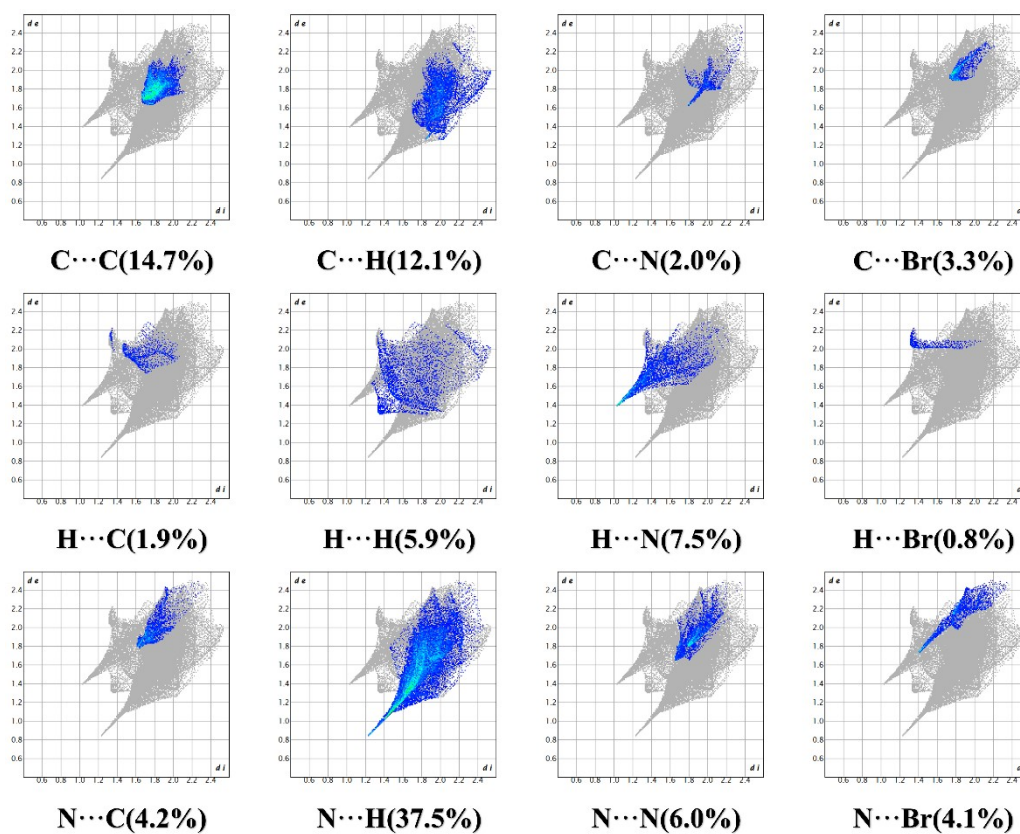

Figure S10. 2D fingerprint distribution and interaction proportion of TCNB-2-BrCZ.

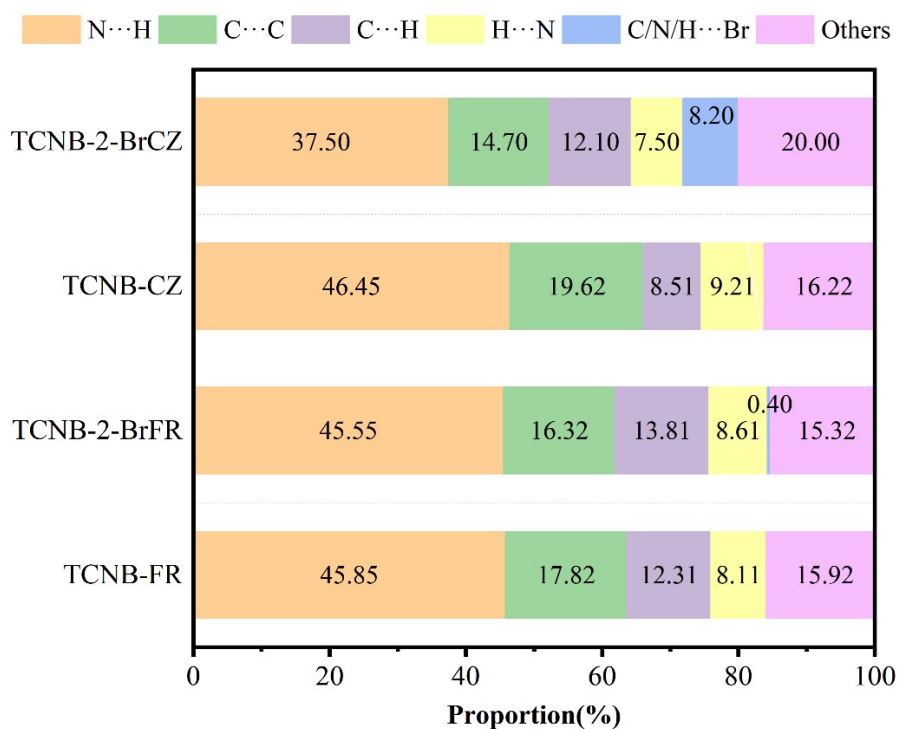

Figure S11. Contributions of various intermolecular contacts in the cocrystals to the Hirshfeld surface.

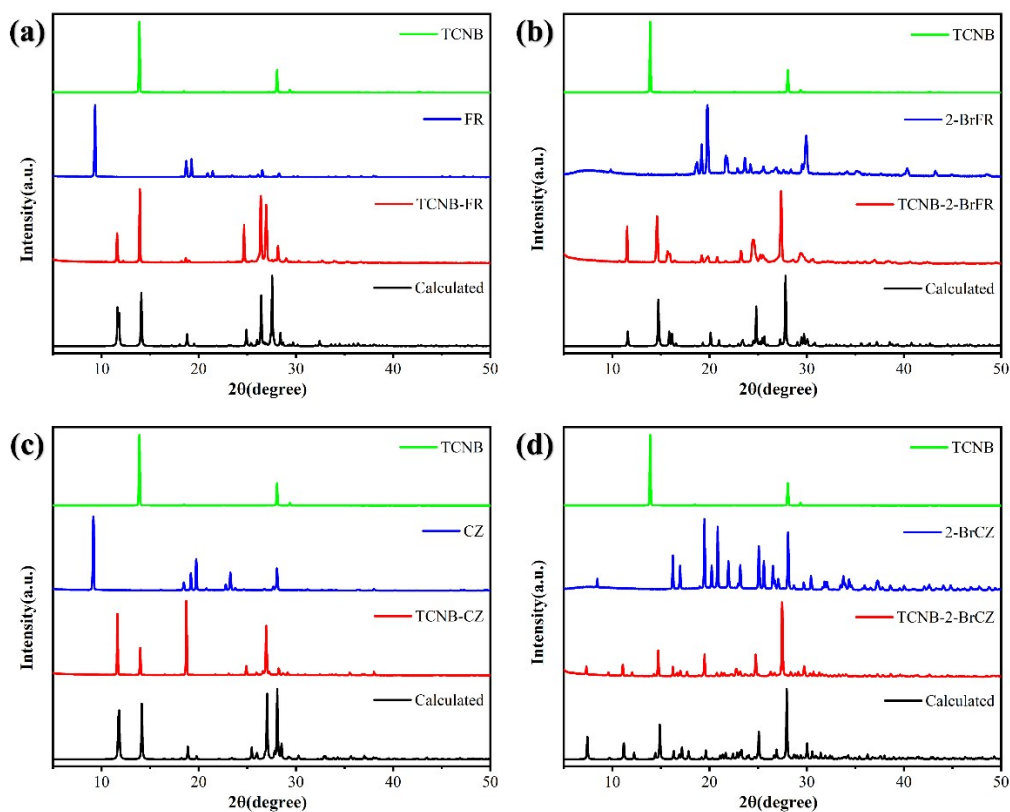

Figure S12. PXRD images of (a) TCNB, FR, TCNB-FR, calculated, (b) TCNB, 2-BrFR, TCNB-2-BrFR, calculated, (c) TCNB, CZ, TCNB-CZ, calculated, (d) TCNB, 2-BrCZ, TCNB-2-BrCZ, calculated.

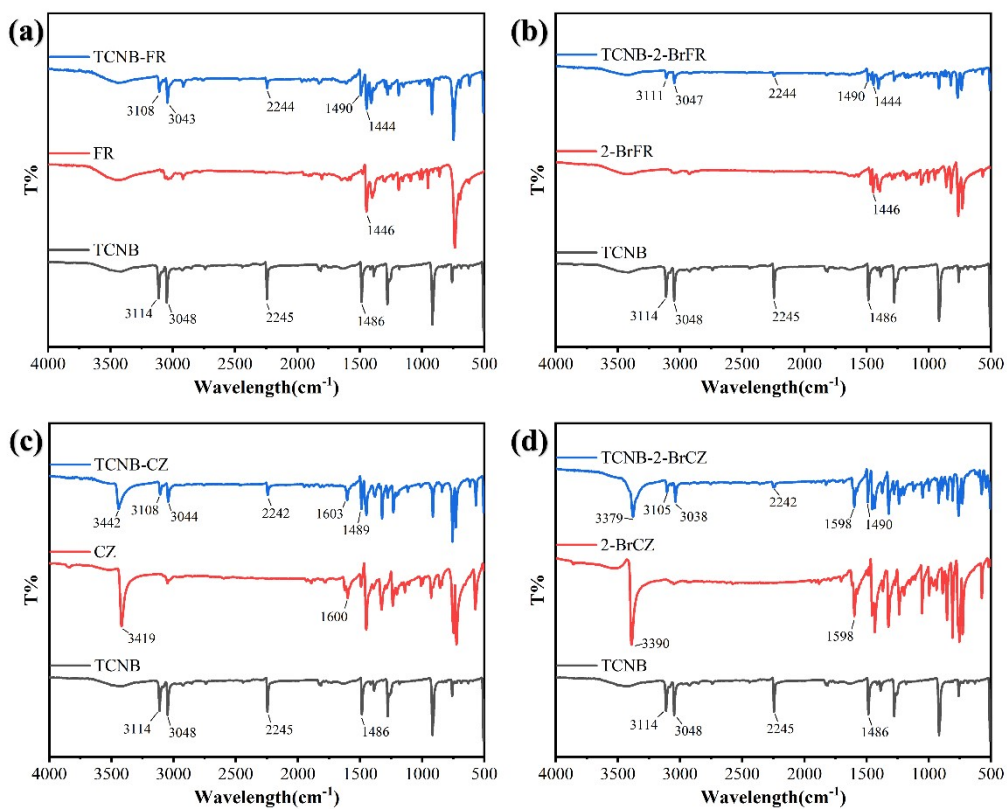

Figure S13. IR spectra of (a) TCNB, FR, TCNB-FR, (b) TCNB, 2-BrFR, TCNB-2-BrFR, (c) TCNB, CZ, TCNB-CZ, (d) TCNB, 2-BrCZ, TCNB-2-BrCZ.

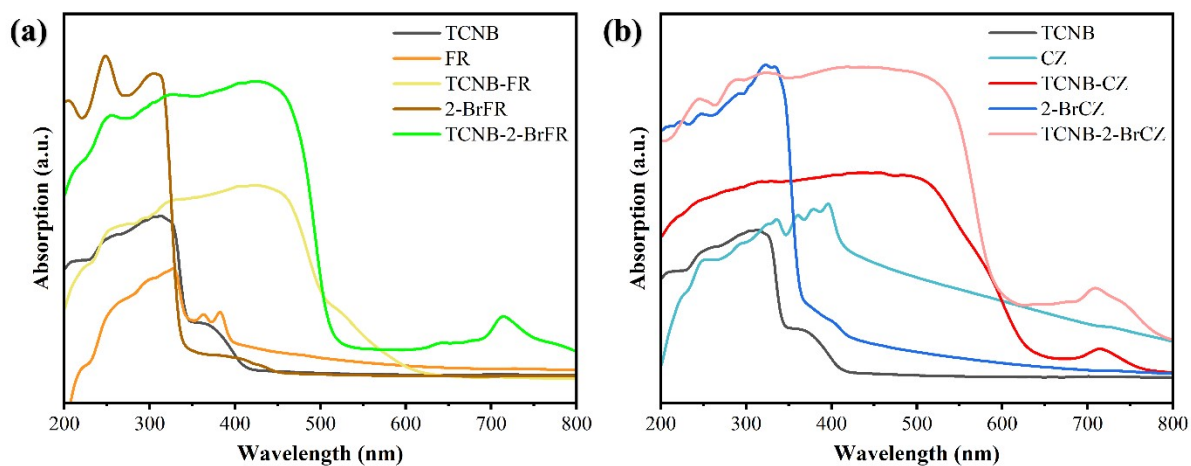

Figure S14. Solid-state absorption spectra of (a) TCNB, FR, TCNB-FR, 2-BrFR, TCNB-2-BrFR, (b) TCNB, CZ, TCNB-CZ, 2-BrCZ, TCNB-2-BrCZ.

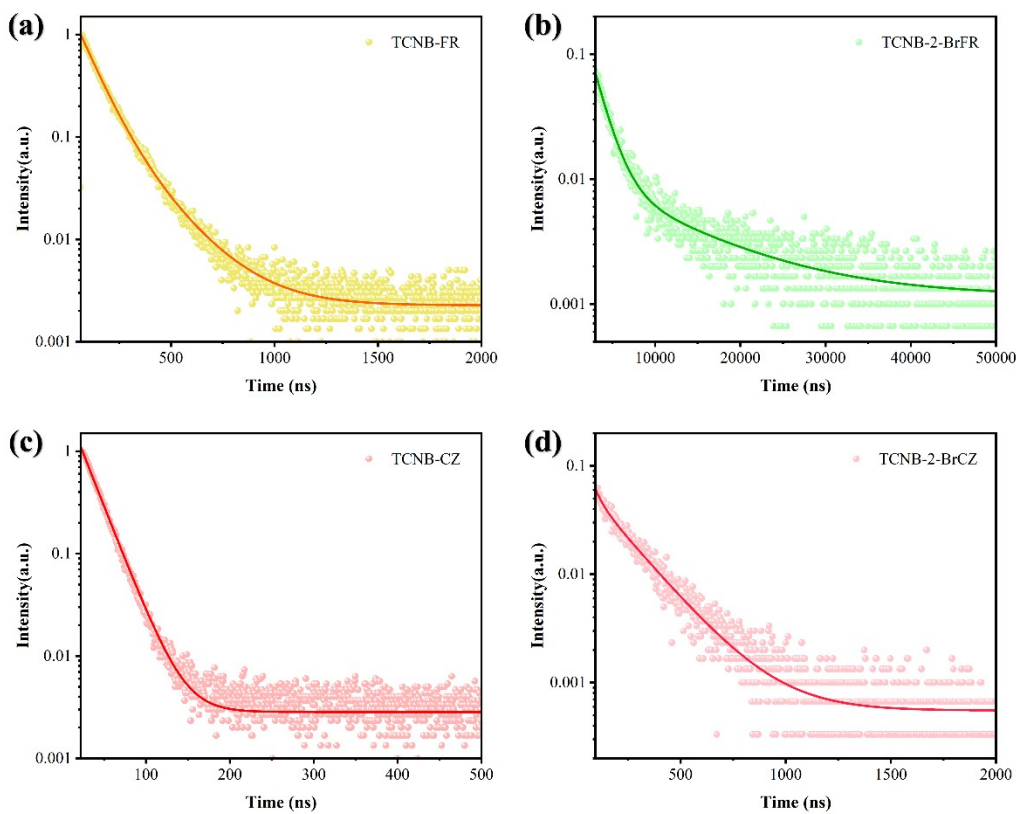

Figure S15. Fluorescence decay curves of cocystals (a) TCNB-FR, (b) TCNB-2-BrFR, (c) TCNB-CZ, (d) TCNB-2-BrCZ.
